# Supplementary material for: Nontoxic (CH3NH3)3Bi2I9 perovskite solar cells free of hole conductors with an alternative architectural design and a solution-processable approach
Source: Royal Society of Chemistry journal article supplement (doi:10.1039/c7ra04924b), 2017-01-01
Supplement: c7ra04924b1.pdf [file c7ra04924b1.pdf]

## Supporting Information

### **Nontoxic $(\text{CH}_3\text{NH}_3)_3\text{Bi}_2\text{I}_9$ Perovskite Solar Cells Free of Hole Conductors with an Alternative Architectural Design and a Solution-Processable Approach**

Mengqin Kong,<sup>#,a</sup> Hang Hu,<sup>#,a</sup> Li Wan,<sup>\*,a</sup> Miaomiao Chen,<sup>a</sup> Yisheng Gan,<sup>a</sup> Jia Wang,<sup>b</sup> Fengxiang Chen,<sup>a</sup> Binghai Dong,<sup>a</sup> Dominik Eder,<sup>b</sup> Shimin Wang<sup>a</sup>

<sup>a</sup> Hubei Collaborative Innovation Center for Advanced Organic Chemical Materials, Key Laboratory for the Green Preparation and Application of Functional Materials, Ministry of Education, Faculty of Materials Science and Engineering, Hubei University, Wuhan 430062, PR China.

<sup>b</sup> Institute of Materials Chemistry, Technische Universität Wien, Getreidemarkt 9/165, 1060 Vienna, Austria.

<sup>#</sup> These authors contributed equally to this work.

<sup>\*</sup> Corresponding Author

E-mail: [wanli@hubu.edu.cn](mailto:wanli@hubu.edu.cn)

Figure S1

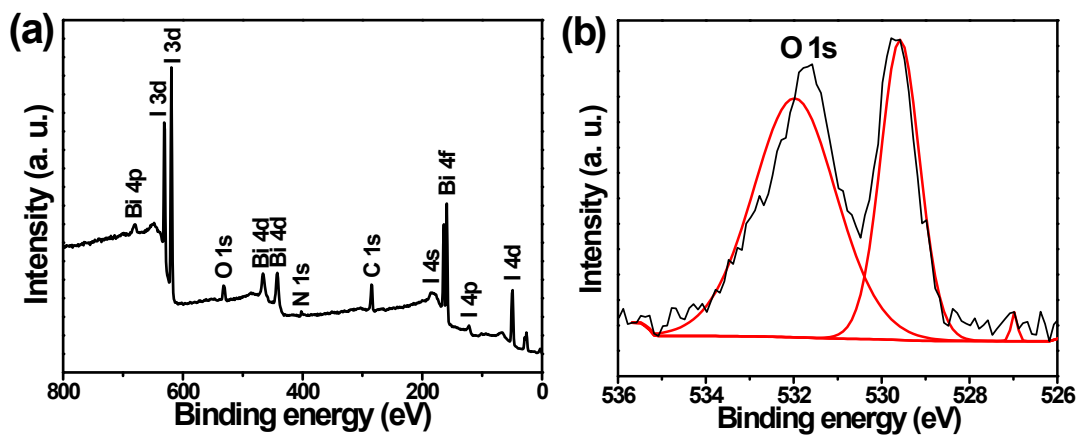

Fig. S1 XPS spectrum of MBI monocystal powder: (a) survey-scan spectrum and (b) the highresolution spectra O 1s.

**Figure S2**

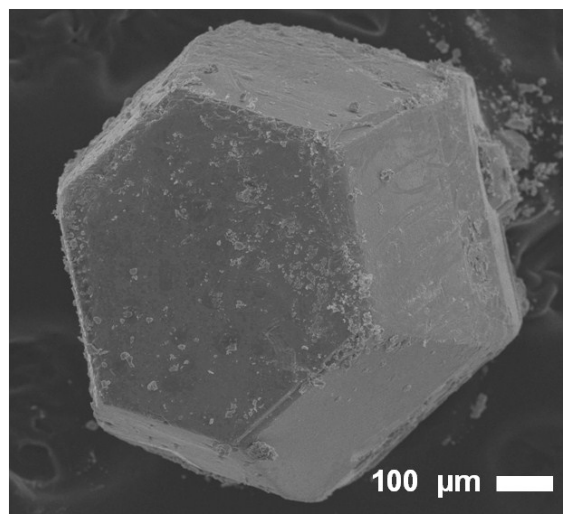

**Fig. S2** The low resolution SEM image of single crystals of MBI.

**Figure S3**

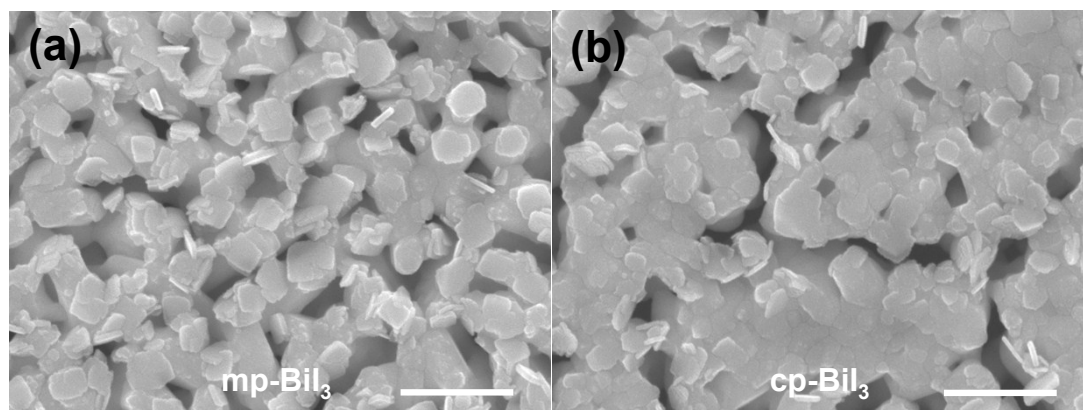

**Fig. S3** SEM image of mp-Bil<sub>3</sub> and cp-Bil<sub>3</sub> layers, the scale bars on the images are 500 nm.

**Figure S4**

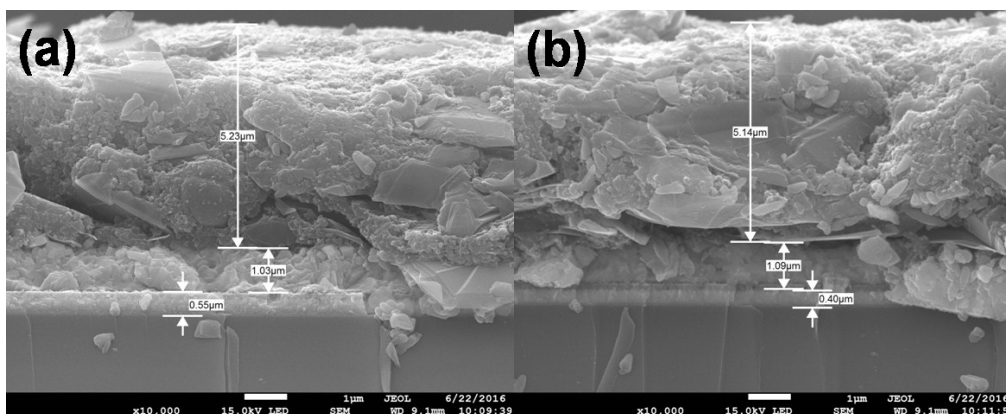

**Fig. S4** Cross-sectional FE-SEM image of the overall planar (a) and mesoporous (b) devices, both of the scale bars on the images are 1 μm.

Figure S5

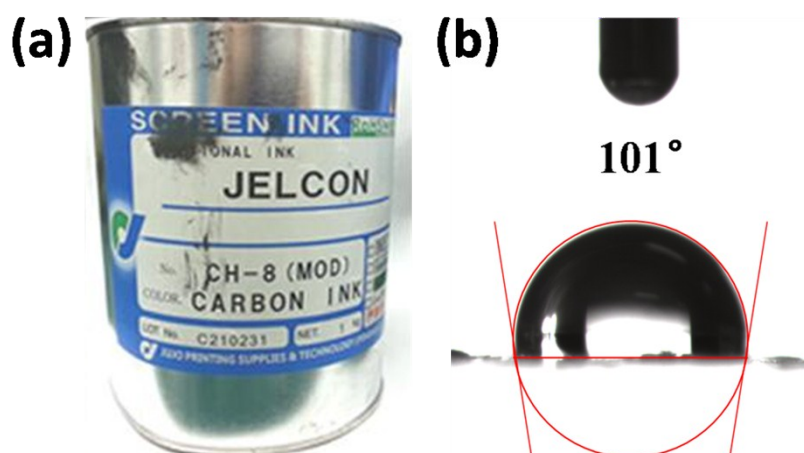

**Fig. S5** (a) Image of carbon conductive paste. (b) Contact angles for H<sub>2</sub>O on carbon surfaces in a full cell.

**Table S1** The composition of the carbon paste.

| Composition                               | Percentage (%) | Chemical formula                       |
|-------------------------------------------|----------------|----------------------------------------|
| Pigment (black carbon)                    | 15–25 (1–10)   | –                                      |
| Synthetic resin                           | 10–20          | –                                      |
| Diethylene glycol monoethyl ether acetate | 45–55          | $C_8H_{16}O_4$                         |
| Aromatic hydrocarbon (naphtha)            | 10–20          | C12–C13<br>(majority of alkyl benzene) |

**Table S2** Summarized average and standard deviation values for 7 devices based on different devices architecture and MBI-fabricated method under simulated AM 1.5G (100 mW cm<sup>-2</sup> irradiance).

| samples | $V_{oc}$ (mV) | $J_{sc}$ (mA cm <sup>-2</sup> ) | FF (%)     | PCE (%)       |
|---------|---------------|---------------------------------|------------|---------------|
| 1-mp    | 830 ± 54      | 0.253 ± 0.024                   | 23.4 ± 1.6 | 0.049 ± 0.003 |
| 1-cp    | 721 ± 24      | 0.223 ± 0.014                   | 22.2 ± 1.1 | 0.034 ± 0.004 |
| 2-mp    | 709 ± 10      | 0.277 ± 0.022                   | 22.9 ± 1.7 | 0.045 ± 0.004 |
| 2-cp    | 490 ± 36      | 0.132 ± 0.012                   | 26.2 ± 1.2 | 0.015 ± 0.001 |
